# Supplementary material for: Deletion of the Mitochondrial Superoxide Dismutase sod-2 Extends Lifespan in Caenorhabditis elegans
Source: PubMed Central journal article supplement (PMC2628729; doi:10.1371/journal.pgen.1000361), 2009-02-06
Supplement: pgen.1000361.s005.pdf [file pgen.1000361.s005.pdf]

**Table S1.** Summary of mean and maximum lifespan.

| Strain                                                                                 | Mean Lifespan | Log Rank Test vs. N2 | Maximum Lifespan | P Value vs. N2 | Total Death Events |
|----------------------------------------------------------------------------------------|---------------|----------------------|------------------|----------------|--------------------|
| N2                                                                                     | 17.7 ± 4.0    | N/A                  | 27.4 ± 1.3       | N/A            | 309                |
| <b>sod single deletion mutants</b>                                                     |               |                      |                  |                |                    |
| <i>sod-1(tm776)</i>                                                                    | 17.0 ± 5.5    | 0.97                 | 27.9 ± 2.2       | 0.55           | 158                |
| <i>sod-1(tm783)</i>                                                                    | 17.3 ± 3.6    | 0.06                 | 26.0 ± 1.7       | 0.06           | 292                |
| <i>sod-2(gk257)</i>                                                                    | 23.7 ± 6.6    | <0.0001              | 38.1 ± 2.4       | < 0.0001       | 233                |
| <i>sod-2(ok1030)</i>                                                                   | 27.2 ± 6.5    | <0.0001              | 43.4 ± 4.3       | < 0.0001       | 373                |
| <i>sod-3(tm760)</i>                                                                    | 17.1 ± 3.8    | 0.30                 | 27.2 ± 2.0       | 0.86           | 109                |
| <i>sod-4(gk101)</i>                                                                    | 19.1 ± 4.7    | <0.0001              | 30.7 ± 2.0       | 0.0005         | 214                |
| <i>sod-5(tm1146)</i>                                                                   | 17.2 ± 4.9    | 0.23                 | 28.6 ± 3.6       | 0.34           | 176                |
| <i>sod-5(tm1246)</i>                                                                   | 16.4 ± 4.1    | 0.0002               | 25.8 ± 1.6       | 0.028          | 216                |
| <b>sod-sod double deletion mutants</b>                                                 |               |                      |                  |                |                    |
| <i>sod-1(tm783);sod-2(ok1030)</i>                                                      | 29.3 ± 7.7    | <0.0001              | 46.8 ± 2.7       | <0.0001        | 213                |
| <i>sod-1(tm783);sod-3(tm760)</i>                                                       | 21.0 ± 4.1    | <0.0001              | 30.4 ± 1.9       | 0.0009         | 187                |
| <i>sod-1(tm783);sod-4(gk101)</i>                                                       | 17.5 ± 2.2    | 0.0009               | 22.7 ± 0.7       | <0.0001        | 178                |
| <i>sod-1(tm783);sod-5(tm1246)</i>                                                      | 18.2 ± 4.5    | 0.28                 | 27.5 ± 3.6       | 0.94           | 205                |
| <i>sod-2(ok1030);sod-3(tm760)</i>                                                      | 25.1 ± 4.6    | <0.0001              | 34.0 ± 2.1       | <0.0001        | 194                |
| <i>sod-2(ok1030);sod-4(gk101)</i>                                                      | 26.8 ± 7.0    | <0.0001              | 41.5 ± 5.7       | <0.0001        | 127                |
| <i>sod-2(ok1030);sod-5(tm1246)</i>                                                     | 24.6 ± 5.2    | <0.0001              | 34.4 ± 0.8       | <0.0001        | 150                |
| <i>sod-3(tm760);sod-5(tm1246)</i>                                                      | 20.0 ± 4.8    | <0.0001              | 31.2 ± 2.0       | 0.0001         | 193                |
| <b>sod triple deletion mutants</b>                                                     |               |                      |                  |                |                    |
| <i>sod-1(tm783);sod-2(ok1030);sod-4(gk101)</i>                                         | 23.3 ± 6.2    | <0.0001              | 43.4 ± 4.6       | <0.0001        | 225                |
| <i>sod-1(tm783);sod-3(tm760);sod-5(tm1246)</i>                                         | 18.9 ± 4.3    | 0.08                 | 29.1 ± 6.6       | 0.44           | 185                |
| <i>sod-2(ok1030);sod-3(tm760);sod-5(tm1246)</i>                                        | 20.3 ± 4.7    | <0.0001              | 32.8 ± 1.8       | 0.0028         | 228                |
| <b>sod-2 double deletion mutants with mutants in known lifespan extension pathways</b> |               |                      |                  |                |                    |
| <i>daf-2(e1370)</i>                                                                    | 60.8 ± 17.6   | <0.0001              | 90.5 ± 3.5       | <0.0001        | 168                |
| <i>daf-2(e1370);sod-2(ok1030)</i>                                                      | 63.5 ± 12.3   | <0.0001              | 82.2 ± 1.9       | <0.0001        | 159                |
| <i>clk-1(qm30)</i>                                                                     | 29.1 ± 8.4    | <0.0001              | 49.8 ± 2.2       | <0.0001        | 112                |
| <i>clk-1(qm30);sod-2(ok1030)</i>                                                       | 43.7 ± 9.3    | <0.0001              | 60.8 ± 4.1       | <0.0001        | 147                |
| <i>isp-1(qm150)</i>                                                                    | 42.3 ± 13.9   | <0.0001              | 67.7 ± 1.9       | <0.0001        | 114                |
| <i>isp-1(qm150);sod-2(ok1030)</i>                                                      | 16.9 ± 2.0    | <0.0001              | 19.8 ± 0.9       | <0.0001        | 69                 |
| <i>eat-2(ad1116)</i>                                                                   | 36.9 ± 8.5    | <0.0001              | 55.9 ± 5.2       | <0.0001        | 156                |
| <i>eat-2(ad1116);sod-2(ok1030)</i>                                                     | 41.0 ± 11.4   | <0.0001              | 64.1 ± 4.4       | <0.0001        | 111                |
| <i>glp-1(e2141)</i>                                                                    | 32.1 ± 12.4   | <0.0001              | 57.8 ± 3.6       | <0.0001        | 188                |
| <i>glp-1(e2141);sod-2(ok1030)</i>                                                      | 38.4 ± 8.6    | <0.0001              | 55.4 ± 2.9       | <0.0001        | 143                |
